# Supplementary material for: Silencing of lncRNA LINC00857 Enhances BIRC5-Dependent Radio-Sensitivity of Lung Adenocarcinoma Cells by Recruiting NF-κB1
Source: PubMed Central journal article supplement — Mol Ther Nucleic Acids. 2020 Sep 23;22:981–93. doi: 10.1016/j.omtn.2020.09.020 (PMC7679245; doi:10.1016/j.omtn.2020.09.020), 2020-09-23
Supplement: mmc1.pdf [file mmc1.pdf]

OMTN, Volume 22

## **Supplemental Information**

### **Silencing of lncRNA LINC00857 Enhances BIRC5-Dependent Radio-Sensitivity of Lung Adenocarcinoma Cells by Recruiting NF- $\kappa$ B1**

**Fushi Han, Shusong Yang, Wei Wang, Xinghong Huang, Dongdong Huang, and Shuzhen Chen**

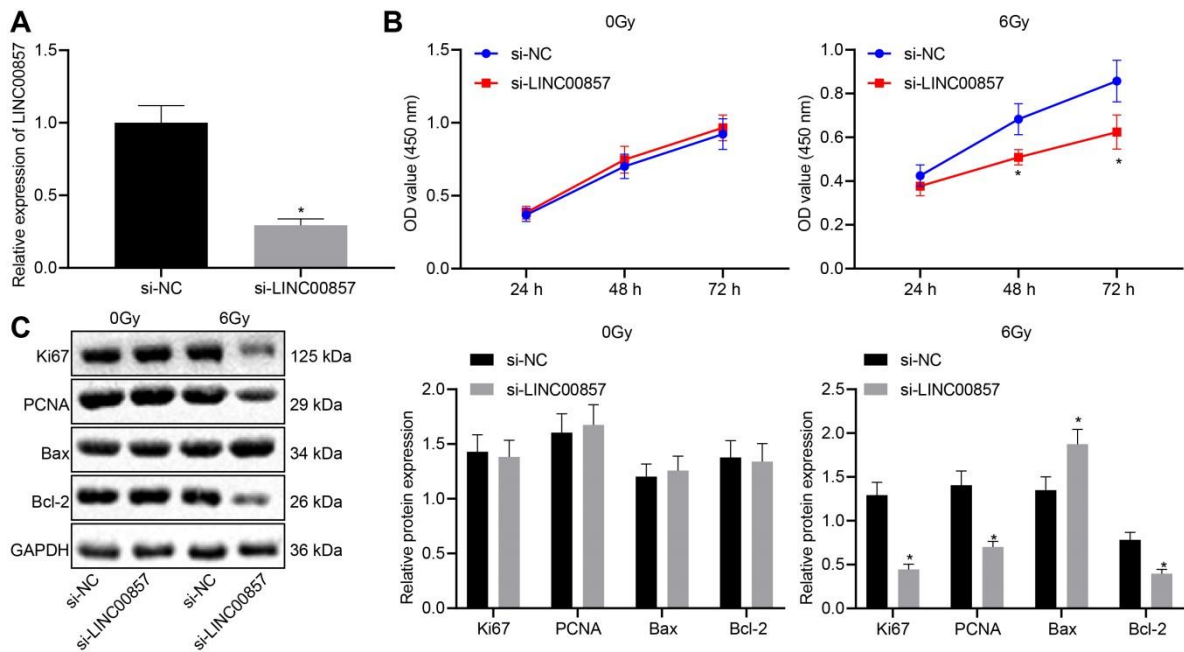

**Supplementary Figure 1.** LINC00857 knockdown enhanced radio-sensitivity of H2444 cells. A, Transfection efficiency measured by RT-qPCR. B, Viability of H2444 cells after LINC00857 knockdown tested using CCK-8. C, Western blot analysis of Ki67, PCNA, Bax and Bcl-2 protein expression in H2444 cells after LINC00857 knockdown. \*  $p < 0.05$  vs. si-NC; measurement data were expressed as mean  $\pm$  standard deviation and analyzed by unpaired  $t$  test. OD values at different time points were compared using two-way ANOVA. The cell experiments were conducted three times independently.
